# Supplementary material for: Design, synthesis and electronic properties of push–pull–push type dye
Source: Royal Society of Chemistry journal article supplement (doi:10.1039/c5ra13416a), 2015-01-01

## Supporting information

### Design, synthesis and electronic properties of push-pull-push type dye

Rajen Kundu,\*<sup>a</sup> Chandramouli Kulshreshtha \*<sup>b</sup>

<sup>a</sup> Department of Chemistry, Pohang University of Science and Technology, Pohang 790-784, Republic of Korea

<sup>b</sup> Department of Chemical Engineering, Pohang University of Science and Technology, Pohang 790-784, Republic of Korea

| Sl. No | Content                                                                                                                                    | Page  |
|--------|--------------------------------------------------------------------------------------------------------------------------------------------|-------|
| 1      | Normalized UV-visible and fluorescence spectra of the dyes (1 – 5)                                                                         | 2-3   |
| 2      | Photophysical data of the dyes (1 – 5)                                                                                                     | 4     |
| 3      | Colour of the fluorescence images of the dyes (1 – 5) in <i>o</i> -Dichlorobenzene under a 254 nm wavelength transilluminator              | 5     |
| 4      | Colour of the fluorescence images and solvatochromism of the dyes (1 – 5) in different solvents under a 254 nm wavelength transilluminator | 5     |
| 5      | Cyclic voltammetry diagram of dyes 1-5, representing E <sub>ox</sub> and E <sub>red</sub>                                                  | 6     |
| 6      | Energy parameters of the dyes 1–5                                                                                                          | 7     |
| 7      | Cartesian coordinates of the optimized geometry                                                                                            | 8-12  |
| 8      | <sup>1</sup> H and <sup>13</sup> C NMR                                                                                                     | 13-23 |

# 1. Normalized UV-visible and fluorescence spectra of the dyes (1 – 5)

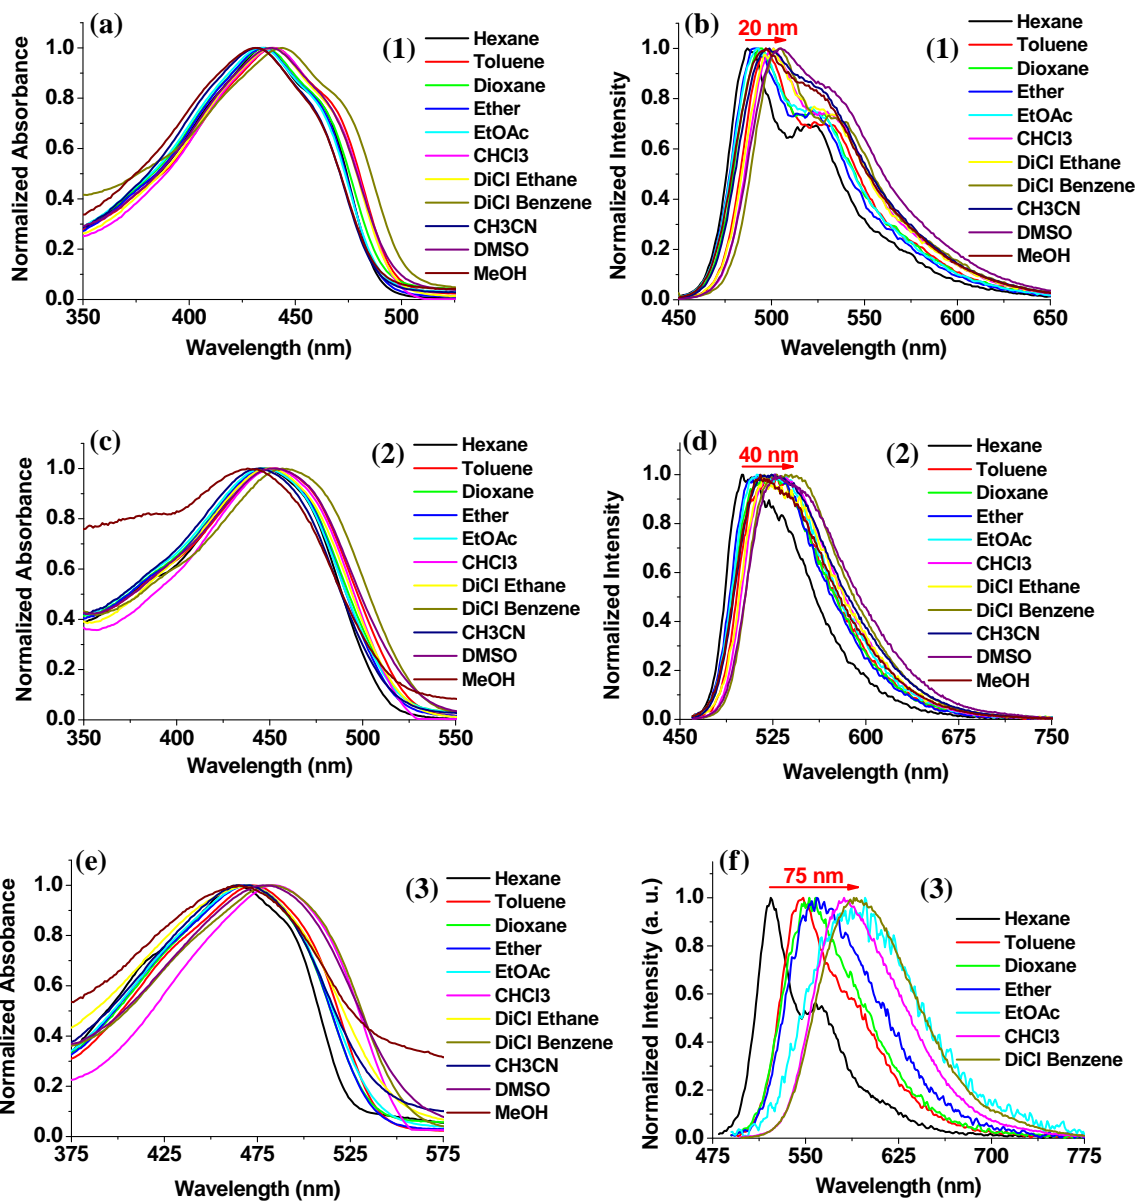

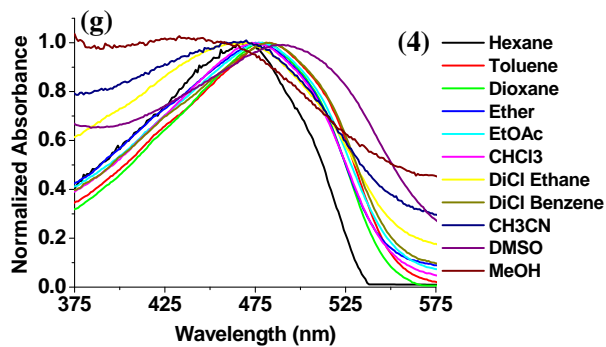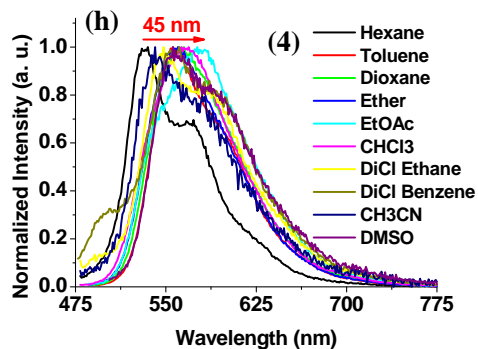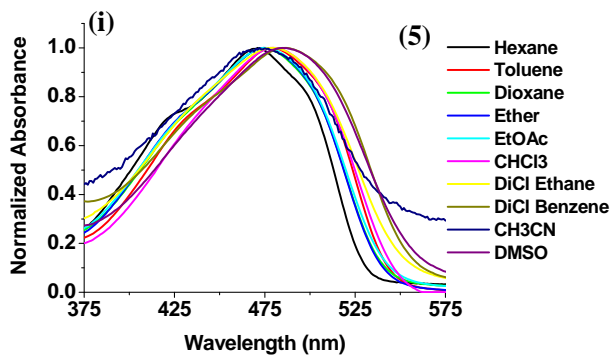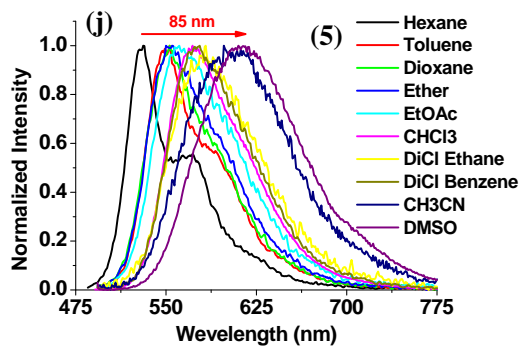

## 2. Photophysical data of the dyes (1 – 5)

| <b>1</b>           |                            |                                        |                           | <b>2</b>           |                            |                                        |                           |
|--------------------|----------------------------|----------------------------------------|---------------------------|--------------------|----------------------------|----------------------------------------|---------------------------|
| Solvents           | Max <sup>Abs</sup><br>(nm) | (M <sup>-1</sup><br>cm <sup>-1</sup> ) | Max <sup>Fl</sup><br>(nm) | Solvents           | Max <sup>Abs</sup><br>(nm) | (M <sup>-1</sup><br>cm <sup>-1</sup> ) | Max <sup>Fl</sup><br>(nm) |
| Hexane             | 437                        | 45000                                  | 487                       | Hexane             | 450                        | 30200                                  | 500                       |
| Toluene            | 441                        | 43700                                  | 497                       | Toluene            | 454                        | 42700                                  | 527                       |
| Dioxane            | 436                        | 47900                                  | 495                       | Dioxane            | 449                        | 40500                                  | 525                       |
| Ether              | 437                        | 43700                                  | 492                       | Ether              | 450                        | 39100                                  | 523                       |
| EtOAc              | 435                        | 47200                                  | 493                       | EtOAc              | 451                        | 40500                                  | 525                       |
| CHCl <sub>3</sub>  | 440                        | 45400                                  | 501                       | CHCl <sub>3</sub>  | 453                        | 37100                                  | 529                       |
| DiClEthane         | 439                        | 45600                                  | 501                       | DiClEthane         | 452                        | 37800                                  | 526                       |
| DiClBenzene        | 446                        | 45400                                  | 504                       | DiClBenzene        | 463                        | 35600                                  | 540                       |
| CH <sub>3</sub> CN | 433                        | 42600                                  | 500                       | CH <sub>3</sub> CN | 447                        | 37700                                  | 527                       |
| DMSO               | 440                        | 44700                                  | 507                       | DMSO               | 456                        | 37200                                  | 532                       |
| MeOH               | 432                        | 30200                                  | 498                       | MeOH               | 445                        | 13000                                  | 522                       |

| <b>3</b>           |                            |                                        |                           | <b>4</b>           |                            |                                        |                           |
|--------------------|----------------------------|----------------------------------------|---------------------------|--------------------|----------------------------|----------------------------------------|---------------------------|
| Solvents           | Max <sup>Abs</sup><br>(nm) | (M <sup>-1</sup><br>cm <sup>-1</sup> ) | Max <sup>Fl</sup><br>(nm) | Solvents           | Max <sup>Abs</sup><br>(nm) | (M <sup>-1</sup><br>cm <sup>-1</sup> ) | Max <sup>Fl</sup><br>(nm) |
| Hexane             | 465                        | 19700                                  | 520                       | Hexane             | 473                        | 7700                                   | 533                       |
| Toluene            | 473                        | 37100                                  | 548                       | Toluene            | 483                        | 19800                                  | 557                       |
| Dioxane            | 470                        | 36200                                  | 555                       | Dioxane            | 478                        | 20700                                  | 564                       |
| Ether              | 470                        | 35000                                  | 562                       | Ether              | 477                        | 22400                                  | 559                       |
| EtOAc              | 471                        | 34700                                  | 595                       | EtOAc              | 480                        | 20800                                  | 578                       |
| CHCl <sub>3</sub>  | 485                        | 30600                                  | 581                       | CHCl <sub>3</sub>  | 477                        | 18000                                  | 566                       |
| DiClEthane         | 470                        | 26900                                  | 603                       | DiClEthane         | 472                        | 15000                                  | 550                       |
| DiClBenzene        | 485                        | 30500                                  | 593                       | DiClBenzene        | 482                        | 25700                                  | 559                       |
| CH <sub>3</sub> CN | 470                        | 27500                                  |                           | CH <sub>3</sub> CN | 475                        | 6300                                   | 545                       |
| DMSO               | 481                        | 31500                                  |                           | DMSO               | 494                        | 15300                                  | 560                       |
| MeOH               | 466                        | 11100                                  |                           | MeOH               | 470                        | 5000                                   |                           |

| <b>5</b>           |                            |                                        |                           |
|--------------------|----------------------------|----------------------------------------|---------------------------|
| Solvents           | Max <sup>Abs</sup><br>(nm) | (M <sup>-1</sup><br>cm <sup>-1</sup> ) | Max <sup>Fl</sup><br>(nm) |
| Hexane             | 471                        | 28100                                  | 530                       |
| Toluene            | 478                        | 67700                                  | 551                       |
| Dioxane            | 475                        | 66400                                  | 553                       |
| Ether              | 476                        | 68600                                  | 554                       |
| EtOAc              | 475                        | 69000                                  | 560                       |
| CHCl <sub>3</sub>  | 482                        | 62500                                  | 572                       |
| DiClEthane         | 480                        | 57500                                  | 582                       |
| DiClBenzene        | 488                        | 63800                                  | 577                       |
| CH <sub>3</sub> CN | 472                        | 6100                                   | 609                       |
| DMSO               | 487                        | 45700                                  | 615                       |
| MeOH               | 472                        | 3700                                   |                           |

3. Colour of the fluorescence images of the dyes (1 – 5) in *o*-Dichlorobenzene under a 254 nm wavelength transilluminator

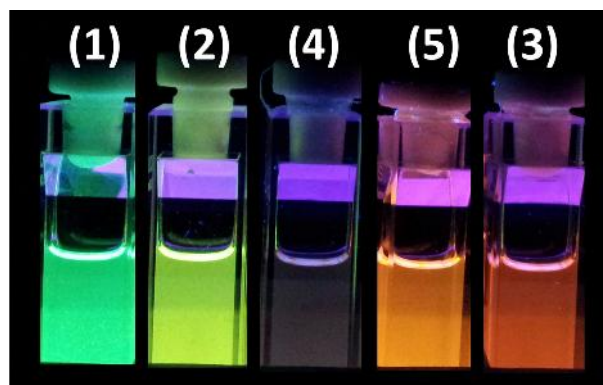

4. Colour of the fluorescence images and solvatochromism of the dyes (1 – 5) in different solvents under a 254 nm wavelength transilluminator

| Dye | Solvents: Hexane |      | Toluene            |      | <i>o</i> -Dichlorobenzene |      | CHCl <sub>3</sub> |      |
|-----|------------------|------|--------------------|------|---------------------------|------|-------------------|------|
|     | EtOAc            | DMSO | CH <sub>3</sub> CN | MeOH | MeOH                      | MeOH | MeOH              | MeOH |
| 1   |                  |      |                    |      |                           |      |                   |      |
| 2   |                  |      |                    |      |                           |      |                   |      |
| 3   |                  |      |                    |      |                           |      |                   |      |
| 4   |                  |      |                    |      |                           |      |                   |      |
| 5   |                  |      |                    |      |                           |      |                   |      |

## 5. Cyclic voltammetry diagram of dyes 1-5, representing $E_{ox}$ and $E_{red}$

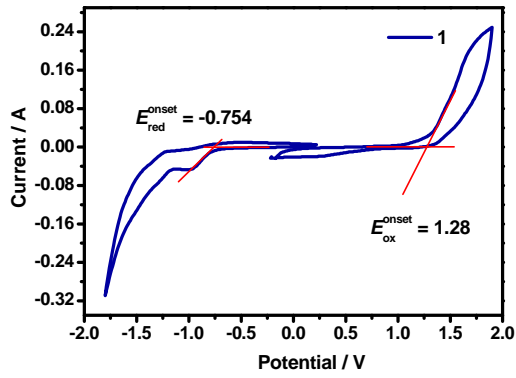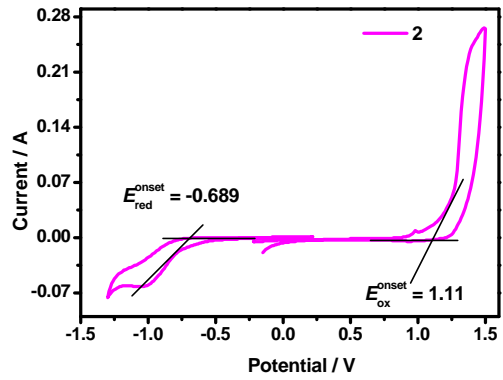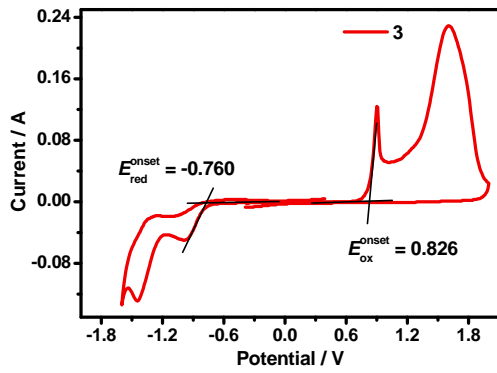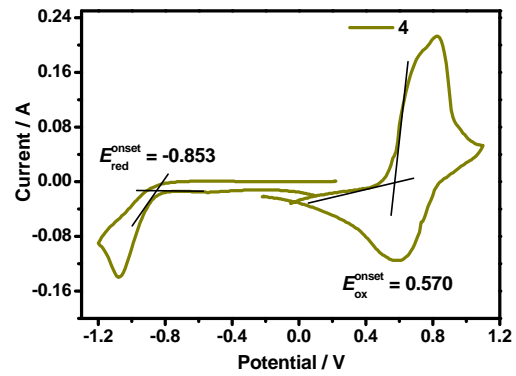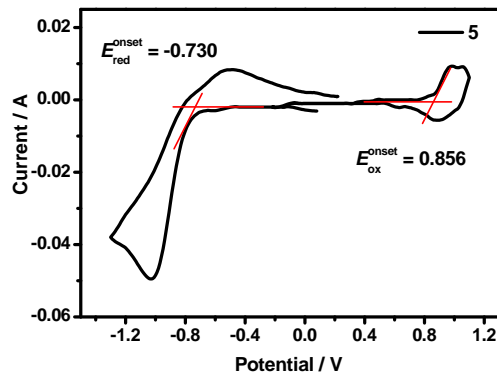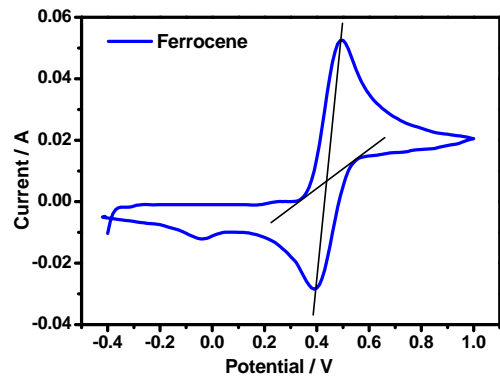

## 6. Energy parameters of the dyes 1–5

| Entry                 | $E_{\text{HOMO}}$ (eV) | $E_{\text{LUMO}}$ (eV) | $E_{\text{ox-red}}$ (eV) |
|-----------------------|------------------------|------------------------|--------------------------|
| <b>9<sup>a</sup></b>  | (-7.30)                | (-1.78)                | 5.52                     |
| <b>11<sup>a</sup></b> | -5.68                  | -2.91                  | 2.77                     |
| <b>1</b>              | -5.643                 | -3.609                 | 2.034                    |
| <b>2</b>              | -5.473                 | -3.674                 | 1.799                    |
| <b>3</b>              | -5.189                 | -3.603                 | 1.586                    |
| <b>4</b>              | -5.219                 | -3.633                 | 1.586                    |
| <b>5</b>              | -4.929                 | -3.51                  | 1.419                    |

<sup>a</sup> The data were taken from the reference (K. Takimiya, I. Osaka, and M. Nakano, *Chem. Mater.*, 2014, **26**, 587).

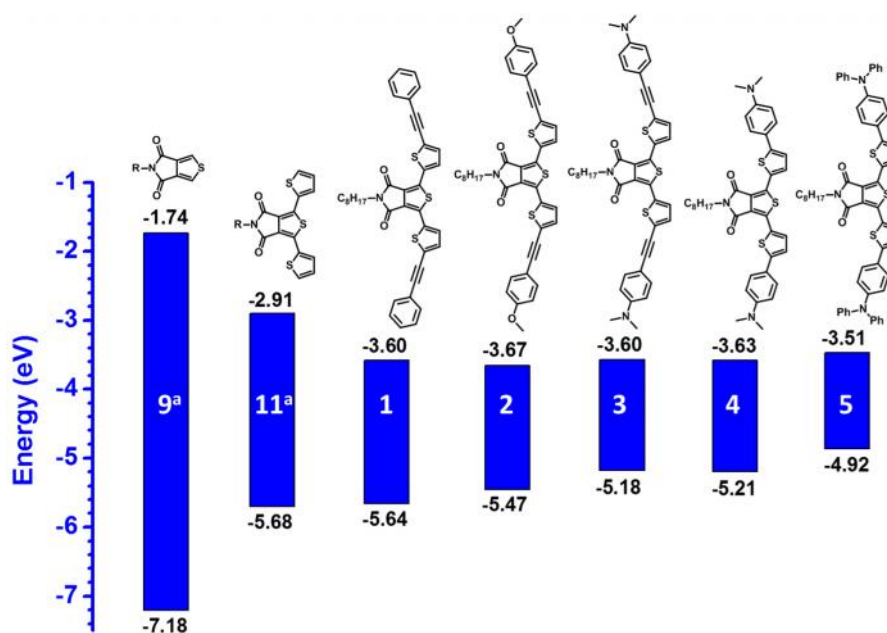

## 7. Cartesian coordinates of the optimized geometry

| <b>1</b>                                                                           |             |             |             |   |              |             |             |
|------------------------------------------------------------------------------------|-------------|-------------|-------------|---|--------------|-------------|-------------|
| 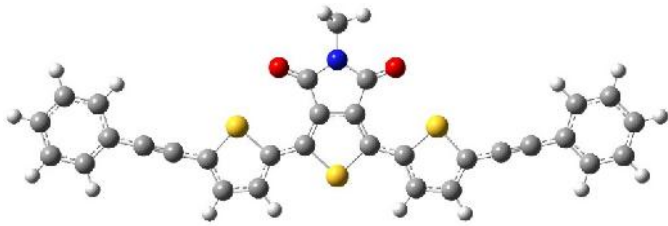 |             |             |             |   |              |             |             |
| O 1                                                                                |             |             |             | H | -0.50575600  | 4.70460500  | 0.89064500  |
| C                                                                                  | -1.29315200 | -0.55993800 | 0.00001600  | H | 1.04750300   | 4.63231800  | 0.00027800  |
| C                                                                                  | -0.71212300 | 0.68486500  | -0.00002400 | C | 6.54645500   | -0.83034700 | 0.00083900  |
| C                                                                                  | 0.70952200  | 0.68578400  | 0.00015300  | C | 7.73507100   | -0.57467100 | 0.00092400  |
| C                                                                                  | 1.29280100  | -0.55844500 | 0.00031300  | C | -6.54639500  | -0.83339500 | -0.00084300 |
| C                                                                                  | -1.18412600 | 2.08164300  | -0.00021700 | C | -7.73479600  | -0.57672700 | -0.00111400 |
| O                                                                                  | -2.32866100 | 2.54749000  | -0.00025600 | C | 9.12143400   | -0.26471100 | 0.00110000  |
| C                                                                                  | 1.17978600  | 2.08205200  | 0.00011800  | C | 10.08876900  | -1.29196200 | 0.00132200  |
| O                                                                                  | 2.32529200  | 2.54717100  | 0.00033000  | C | 9.55037000   | 1.07980800  | 0.00105400  |
| N                                                                                  | -0.00374200 | 2.85878200  | 0.00001500  | C | 11.44512700  | -0.97765900 | 0.00149400  |
| S                                                                                  | 0.00071200  | -1.77904700 | 0.00025600  | H | 9.76190800   | -2.32428100 | 0.00135600  |
| C                                                                                  | 2.67147200  | -0.95723100 | 0.00051500  | C | 10.90931500  | 1.38190700  | 0.00122800  |
| C                                                                                  | 3.15200000  | -2.26334200 | 0.00070100  | H | 8.80959700   | 1.86951700  | 0.00088200  |
| S                                                                                  | 3.99986500  | 0.19216600  | 0.00061700  | C | 11.86064900  | 0.35727900  | 0.00144700  |
| C                                                                                  | 4.55711300  | -2.35170400 | 0.00084400  | H | 12.18024400  | -1.77392200 | 0.00166500  |
| H                                                                                  | 2.50133100  | -3.12770400 | 0.00071000  | H | 11.22837500  | 2.41757300  | 0.00119000  |
| C                                                                                  | 5.17435100  | -1.10672000 | 0.00075900  | C | -9.12081100  | -0.26517900 | -0.00149600 |
| H                                                                                  | 5.11085500  | -3.27869500 | 0.00097400  | C | -10.08942600 | -1.29121300 | -0.00175000 |
| C                                                                                  | -2.67156000 | -0.95980000 | -0.00010700 | C | -9.54809200  | 1.07987600  | -0.00162900 |
| C                                                                                  | -3.15165200 | -2.26598200 | -0.00005000 | C | -11.44539900 | -0.97523200 | -0.00212700 |
| S                                                                                  | -4.00009300 | 0.18947900  | -0.00024300 | H | -9.76384400  | -2.32393700 | -0.00164800 |
| C                                                                                  | -4.55682900 | -2.35464500 | -0.00028400 | C | -10.90666200 | 1.38365800  | -0.00200700 |
| H                                                                                  | -2.50075700 | -3.13018900 | 0.00010200  | H | -8.80633100  | 1.86865900  | -0.00143300 |
| C                                                                                  | -5.17427200 | -1.10980000 | -0.00054100 | C | -11.85927300 | 0.36021700  | -0.00225700 |
| H                                                                                  | -5.11036100 | -3.28176900 | -0.00032400 | H | -12.18150400 | -1.77058500 | -0.00232100 |
| C                                                                                  | 0.00072500  | 4.32243900  | 0.00009100  | H | -11.22442900 | 2.41972500  | -0.00210700 |
| H                                                                                  | -0.50546100 | 4.70469100  | -0.89059300 | H | 12.91732400  | 0.59723200  | 0.00158100  |
|                                                                                    |             |             |             | H | -12.91565000 | 0.60148700  | -0.00255000 |



## 2

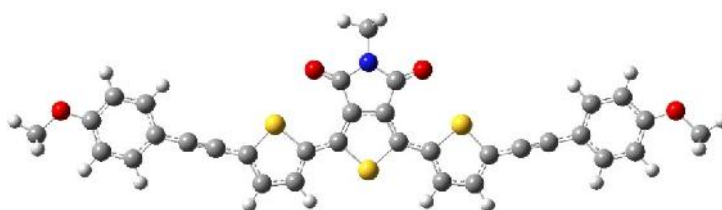

|     |             |             |             |   |              |             |             |
|-----|-------------|-------------|-------------|---|--------------|-------------|-------------|
| 0 1 |             |             |             | C | 7.73646400   | -0.59843800 | 0.00091800  |
| C   | 1.29393900  | -0.57880500 | -0.00001200 | C | -9.12025600  | -0.28406100 | -0.00108900 |
| C   | 0.71255900  | 0.66600500  | -0.00004900 | C | -10.09421500 | -1.30031400 | -0.00185800 |
| C   | -0.70957700 | 0.66709100  | -0.00019100 | C | -9.55635000  | 1.06235000  | -0.00063600 |
| C   | -1.29351200 | -0.57701300 | -0.00027500 | C | -11.45166800 | -0.99182100 | -0.00218100 |
| C   | 1.18471800  | 2.06214800  | 0.00003600  | H | -9.77621300  | -2.33546600 | -0.00221100 |
| O   | 2.32909600  | 2.52898300  | 0.00013700  | C | -10.90555600 | 1.36624100  | -0.00095100 |
| C   | -1.17966500 | 2.06281300  | -0.00019300 | H | -8.81918600  | 1.85520700  | -0.00004100 |
| O   | -2.32490300 | 2.52921900  | -0.00026800 | C | -11.86979300 | 0.34399900  | -0.00173100 |
| N   | 0.00421400  | 2.83956000  | -0.00005900 | H | -12.17375200 | -1.79676900 | -0.00278800 |
| S   | -0.00081900 | -1.79810600 | -0.00023400 | H | -11.25333700 | 2.39060500  | -0.00061700 |
| C   | -2.67132500 | -0.97617300 | -0.00042500 | C | 9.11966900   | -0.28612700 | 0.00131000  |
| C   | -3.15209700 | -2.28217400 | -0.00062500 | C | 10.09493900  | -1.30110200 | 0.00189200  |
| S   | -4.00142900 | 0.17282200  | -0.00042200 | C | 9.55402600   | 1.06085300  | 0.00113800  |
| C   | -4.55701900 | -2.37146800 | -0.00073100 | C | 11.45200700  | -0.99084900 | 0.00230000  |
| H   | -2.50096200 | -3.14626900 | -0.00068800 | H | 9.77827800   | -2.33666600 | 0.00202900  |
| C   | -5.17595600 | -1.12678900 | -0.00060700 | C | 10.90284200  | 1.36649300  | 0.00154100  |
| H   | -5.10997000 | -3.29893600 | -0.00087800 | H | 8.81582400   | 1.85274400  | 0.00069100  |
| C   | 2.67140000  | -0.97938100 | 0.00015300  | C | 11.86839200  | 0.34550700  | 0.00212800  |
| C   | 3.15142200  | -2.28556500 | 0.00023100  | H | 12.17514900  | -1.79485400 | 0.00275200  |
| S   | 4.00191300  | 0.16917600  | 0.00025800  | H | 11.24928900  | 2.39131200  | 0.00142000  |
| C   | 4.55639500  | -2.37549500 | 0.00042100  | C | 14.23461300  | -0.25132000 | 0.00327600  |
| H   | 2.49985600  | -3.14935100 | 0.00017400  | H | 14.18396100  | -0.88345900 | -0.89118200 |
| C   | 5.17582400  | -1.13110700 | 0.00049500  | H | 15.16778600  | 0.31173800  | 0.00353800  |
| H   | 5.10891300  | -3.30323000 | 0.00052000  | H | 14.18313300  | -0.88293000 | 0.89806100  |
| C   | -0.00023700 | 4.30287500  | -0.00002000 | C | -14.23527700 | -0.25585300 | -0.00301300 |
| H   | 0.50595500  | 4.68540700  | 0.89061000  | H | -15.16913200 | 0.30606700  | -0.00316300 |
| H   | 0.50620900  | 4.68545100  | -0.89048600 | H | -14.18300000 | -0.88718400 | -0.89794400 |
| H   | -1.04712500 | 4.61251800  | -0.00015900 | H | -14.18385100 | -0.88811300 | 0.89131100  |
| C   | -6.54756600 | -0.85089800 | -0.00067100 | O | 13.18385900  | 0.76404500  | 0.00249300  |
| C   | -7.73670900 | -0.59476700 | -0.00079300 | O | -13.18575800 | 0.76082500  | -0.00199200 |
| C   | 6.54751600  | -0.85545100 | 0.00069400  |   |              |             |             |

## 3

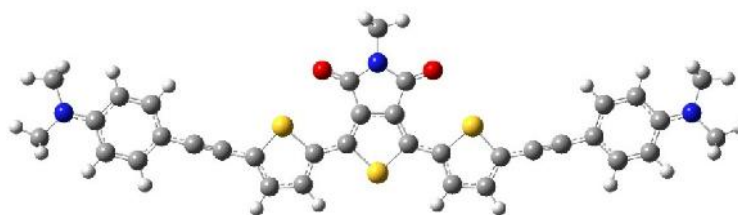

|     |             |             |             |   |              |             |             |
|-----|-------------|-------------|-------------|---|--------------|-------------|-------------|
| 0 1 |             |             |             | C | 11.45504900  | -1.06759900 | 0.00496200  |
| C   | -1.29514800 | -0.70485700 | 0.00007300  | H | 9.80591700   | -2.42997800 | 0.00795500  |
| C   | -0.71314200 | 0.54011000  | -0.00002500 | C | 10.88708900  | 1.28460600  | -0.00550500 |
| C   | 0.70978900  | 0.54127100  | -0.00046600 | H | 8.79834400   | 1.74472800  | -0.01050900 |
| C   | 1.29450400  | -0.70294100 | -0.00065400 | C | 11.89093300  | 0.28222800  | 0.00017400  |
| C   | -1.18538900 | 1.93529000  | 0.00021700  | H | 12.18090100  | -1.86843700 | 0.00944400  |
| O   | -2.32924500 | 2.40444100  | 0.00067500  | H | 11.16736500  | 2.32842100  | -0.00931000 |
| C   | 1.17981100  | 1.93603500  | -0.00058900 | C | -9.11395900  | -0.39062100 | 0.00137500  |
| O   | 2.32447900  | 2.40492300  | -0.00099100 | C | -10.10934500 | -1.39102900 | -0.00335100 |
| N   | -0.00456700 | 2.71293300  | -0.00015600 | C | -9.54001400  | 0.95530600  | 0.00573100  |
| S   | 0.00077700  | -1.92453800 | -0.00029700 | C | -11.45557300 | -1.06702100 | -0.00384900 |
| C   | 2.67103800  | -1.10247400 | -0.00093000 | H | -9.80829900  | -2.43167800 | -0.00676400 |
| C   | 3.15272900  | -2.40842000 | -0.00061700 | C | -10.88436900 | 1.28438300  | 0.00532000  |
| S   | 4.00306100  | 0.04619800  | -0.00157500 | H | -8.79496900  | 1.74161800  | 0.00941900  |
| C   | 4.55724100  | -2.49861600 | -0.00093600 | C | -11.88958100 | 0.28339900  | 0.00046700  |
| H   | 2.50117900  | -3.27232800 | -0.00016300 | H | -12.18253500 | -1.86686400 | -0.00770800 |
| C   | 5.17839700  | -1.25407600 | -0.00150000 | H | -11.16319000 | 2.32859100  | 0.00873400  |
| H   | 5.10959400  | -3.42645100 | -0.00078500 | N | 13.23105700  | 0.60695200  | 0.00111100  |
| C   | -2.67129700 | -1.10597400 | 0.00035000  | N | -13.22929200 | 0.61000500  | -0.00011700 |
| C   | -3.15208500 | -2.41214900 | 0.00003000  | C | -13.64612200 | 2.01946800  | 0.00402300  |
| S   | -4.00384500 | 0.04211400  | 0.00109200  | H | -13.27878900 | 2.55105900  | -0.88400300 |
| C   | -4.55665200 | -2.50313500 | 0.00040300  | H | -14.73639400 | 2.06187900  | 0.00310800  |
| H   | -2.50001400 | -3.27567900 | -0.00046600 | H | -13.28054300 | 2.54516700  | 0.89624900  |
| C   | -5.17842300 | -1.25895900 | 0.00101600  | C | -14.24952100 | -0.44751000 | -0.00644600 |
| H   | -5.10846600 | -3.43129800 | 0.00025400  | H | -14.17079600 | -1.08948600 | 0.88121500  |
| C   | 0.00006900  | 4.17557700  | -0.00008800 | H | -15.23624900 | 0.01833700  | -0.00614000 |
| H   | -0.50636100 | 4.55888900  | -0.89038200 | H | -14.16767100 | -1.08185200 | -0.89930700 |
| H   | -0.50591800 | 4.55879400  | 0.89049900  | C | 14.24984300  | -0.45198400 | 0.00853900  |
| H   | 1.04722400  | 4.48455800  | -0.00033700 | H | 15.23720800  | 0.01251100  | 0.00855900  |
| C   | 6.54839500  | -0.97648300 | -0.00176700 | H | 14.16659300  | -1.08574000 | 0.90167800  |
| C   | 7.73696900  | -0.71261600 | -0.00173400 | H | 14.17072500  | -1.09428600 | -0.87884600 |
| C   | -6.54853700 | -0.98170900 | 0.00139800  | C | 13.64987500  | 2.01584000  | -0.00355100 |
| C   | -7.73690700 | -0.71696500 | 0.00152200  | H | 14.74020200  | 2.05671400  | -0.00231800 |
| C   | 9.11438400  | -0.38795500 | -0.00135600 | H | 13.28531400  | 2.54161100  | -0.89614400 |
| C   | 10.10840200 | -1.38974900 | 0.00415600  | H | 13.28301300  | 2.54835300  | 0.88411400  |
| C   | 9.54229100  | 0.95738200  | -0.00620900 |   |              |             |             |

4

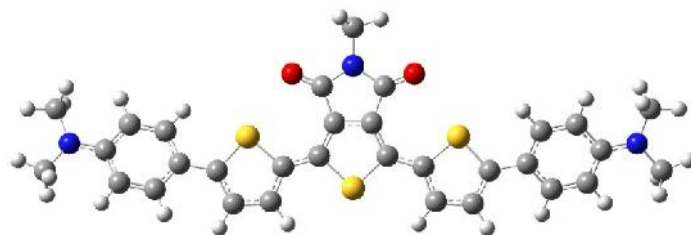

|     |             |             |             |   |              |             |             |
|-----|-------------|-------------|-------------|---|--------------|-------------|-------------|
| 0 1 |             |             |             | C | 8.50139700   | 0.75678200  | 0.45371100  |
| C   | -1.29597000 | -0.44204700 | 0.00244000  | H | 6.46257100   | 1.26628400  | 0.81283400  |
| C   | -0.71373900 | 0.80248500  | 0.00155300  | C | 9.43495900   | -0.21412600 | 0.01413700  |
| C   | 0.71148800  | 0.80321900  | -0.00253900 | H | 9.57425500   | -2.22261400 | -0.79431100 |
| C   | 1.29572300  | -0.44091800 | -0.00308700 | H | 8.84792100   | 1.71574800  | 0.81221600  |
| C   | -1.18529600 | 2.19704800  | 0.00334700  | C | -6.61780600  | -0.72985300 | -0.00195400 |
| O   | -2.32786200 | 2.67030700  | 0.00825700  | C | -7.54437900  | -1.69453100 | 0.43987500  |
| C   | 1.18168300  | 2.19703400  | -0.00486000 | C | -7.13891500  | 0.50133600  | -0.44522300 |
| O   | 2.32540700  | 2.66926400  | -0.00972100 | C | -8.90844600  | -1.45137400 | 0.43439700  |
| N   | -0.00340000 | 2.97408700  | -0.00093300 | H | -7.18381000  | -2.64404000 | 0.81819500  |
| S   | 0.00061600  | -1.66202000 | -0.00018800 | C | -8.50072800  | 0.75711600  | -0.45165600 |
| C   | 2.66985400  | -0.84739800 | -0.00589700 | H | -6.46171400  | 1.26612900  | -0.81034500 |
| C   | 3.14855700  | -2.15164200 | 0.00310600  | C | -9.43466900  | -0.21383300 | -0.01310300 |
| S   | 4.01134400  | 0.29326900  | -0.02669500 | H | -9.57485300  | -2.22308800 | 0.79323800  |
| C   | 4.55652700  | -2.24037600 | 0.00534500  | H | -8.84680600  | 1.71665900  | -0.80906200 |
| H   | 2.49677700  | -3.01538800 | 0.02170200  | N | 10.79313600  | 0.03378500  | 0.02080800  |
| C   | 5.18335300  | -1.00321600 | -0.00461000 | N | -10.79275800 | 0.03479100  | -0.01925500 |
| H   | 5.09502100  | -3.17629400 | 0.04561600  | C | 11.30353200  | 1.33455400  | 0.47422200  |
| C   | -2.66995400 | -0.84927700 | 0.00532400  | H | 10.91849800  | 2.15727800  | -0.14334900 |
| C   | -3.14864000 | -2.15341500 | -0.00389700 | H | 11.03118400  | 1.53269400  | 1.51972600  |
| S   | -4.01116200 | 0.29171100  | 0.02664200  | H | 12.39214500  | 1.32907700  | 0.39898700  |
| C   | -4.55673300 | -2.24195900 | -0.00598400 | C | 11.73424200  | -0.99513100 | -0.44037000 |
| H   | -2.49693800 | -3.01722900 | -0.02284500 | H | 12.75028100  | -0.60926700 | -0.34279300 |
| C   | -5.18332600 | -1.00472800 | 0.00442000  | H | 11.65476400  | -1.91171500 | 0.15951500  |
| H   | -5.09533300 | -3.17781800 | -0.04642300 | H | 11.56434900  | -1.25724100 | -1.49368600 |
| C   | 0.00179300  | 4.43608400  | -0.00119700 | C | -11.73438300 | -0.99456900 | 0.43966600  |
| H   | -0.50705500 | 4.82016200  | -0.88992500 | H | -11.65408800 | -1.91048900 | -0.16112600 |
| H   | -0.50133900 | 4.82042000  | 0.89066400  | H | -11.56594300 | -1.25793100 | 1.49293400  |
| H   | 1.04926600  | 4.74416800  | -0.00480300 | H | -12.75033300 | -0.60869300 | 0.34112300  |
| C   | 6.61786700  | -0.72879000 | 0.00206800  | C | -11.30237500 | 1.33683500  | -0.46989700 |
| C   | 7.54402000  | -1.69340800 | -0.44076000 | H | -10.91531800 | 2.15810500  | 0.14832100  |
| C   | 7.13948500  | 0.50166700  | 0.44681700  | H | -11.03149500 | 1.53631900  | -1.51554000 |
| C   | 8.90818700  | -1.45091100 | -0.43483800 | H | -12.39086500 | 1.33256300  | -0.39281500 |
| H   | 7.18303700  | -2.64232900 | -0.82015900 |   |              |             |             |

## 5

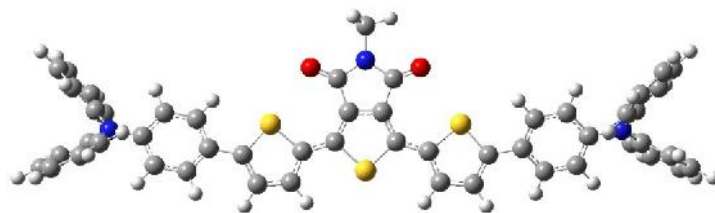

|     |             |             |             |   |              |             |             |
|-----|-------------|-------------|-------------|---|--------------|-------------|-------------|
| 0 1 |             |             |             | H | -9.59267700  | -2.31765100 | 0.74496400  |
| C   | -1.29467300 | -0.55658000 | -0.01043600 | H | -8.86546400  | 1.60843600  | -0.82949600 |
| C   | -0.71328900 | 0.68795000  | -0.00489900 | N | 10.80718200  | -0.06337300 | 0.04016200  |
| C   | 0.71071100  | 0.68875300  | 0.00448300  | N | -10.80713100 | -0.06362500 | -0.03991500 |
| C   | 1.29419500  | -0.55530800 | 0.00892200  | C | -11.39561600 | 0.75936800  | -1.05269800 |
| C   | -1.18489600 | 2.08374100  | -0.00619800 | C | -12.36769500 | 1.71370900  | -0.71339400 |
| O   | -2.32810800 | 2.55410900  | -0.01119600 | C | -11.01788600 | 0.61833300  | -2.39772500 |
| C   | 1.18084300  | 2.08388400  | 0.00712200  | C | -12.95187800 | 2.50424700  | -1.70136000 |
| O   | 2.32516400  | 2.55325900  | 0.01270700  | H | -12.65945400 | 1.82528700  | 0.32282200  |
| N   | -0.00360000 | 2.86062800  | 0.00078000  | C | -11.59393700 | 1.42487600  | -3.37775500 |
| S   | 0.00056000  | -1.77599200 | -0.00136000 | H | -10.27370100 | -0.12103200 | -2.66446500 |
| C   | 2.67007400  | -0.96031100 | 0.01886900  | C | -12.56628400 | 2.36881000  | -3.03746600 |
| C   | 3.14909800  | -2.26418900 | 0.03489700  | H | -13.70076000 | 3.23709700  | -1.42385100 |
| S   | 4.00782600  | 0.18231900  | 0.00366600  | H | -11.29165000 | 1.30488300  | -4.41173600 |
| C   | 4.55755500  | -2.35027200 | 0.04258700  | H | -13.01695300 | 2.98961500  | -3.80235300 |
| H   | 2.49873000  | -3.12884600 | 0.05244600  | C | -11.64003400 | -0.61164400 | 0.98731700  |
| C   | 5.18033000  | -1.11219400 | 0.03113700  | C | -12.89651900 | -1.15088800 | 0.66895900  |
| H   | 5.09751300  | -3.28521100 | 0.08531000  | C | -11.21815300 | -0.60853000 | 2.32667200  |
| C   | -2.67035700 | -0.96246600 | -0.02065300 | C | -13.71311200 | -1.67026200 | 1.67189000  |
| C   | -3.14918700 | -2.26629800 | -0.03776300 | H | -13.22381800 | -1.15440600 | -0.36268100 |
| S   | -4.00799900 | 0.18028300  | -0.00445300 | C | -12.03304200 | -1.14548300 | 3.32167400  |
| C   | -4.55774400 | -2.35239100 | -0.04549100 | H | -10.25325100 | -0.18684300 | 2.57713200  |
| H   | -2.49877500 | -3.13092300 | -0.05596800 | C | -13.28565400 | -1.67584900 | 3.00219600  |
| C   | -5.18048800 | -1.11434700 | -0.03295900 | H | -14.68080300 | -2.08293700 | 1.41072100  |
| H   | -5.09763100 | -3.28735100 | -0.08885600 | H | -11.69374000 | -1.13551300 | 4.35109200  |
| C   | 0.00118700  | 4.32344700  | 0.00149100  | H | -13.91997400 | -2.08616700 | 3.77863100  |
| H   | -0.49934100 | 4.70716500  | -0.89193200 | C | 11.39593900  | 0.75769200  | 1.05442800  |
| H   | -0.51065700 | 4.70622200  | 0.88888100  | C | 12.36802400  | 1.71253700  | 0.71664200  |
| H   | 1.04827500  | 4.63248000  | 0.00807800  | C | 11.01858100  | 0.61405900  | 2.39926500  |
| C   | 6.61685100  | -0.83608000 | 0.03922900  | C | 12.95259900  | 2.50111100  | 1.70595200  |
| C   | 7.53886200  | -1.80160400 | -0.41237900 | H | 12.65950200  | 1.82601300  | -0.31944900 |
| C   | 7.13252400  | 0.39471400  | 0.49150700  | C | 11.59502900  | 1.41864400  | 3.38068400  |
| C   | 8.90418200  | -1.55593200 | -0.40178800 | H | 10.27441100  | -0.12576000 | 2.66479000  |
| H   | 7.17682800  | -2.75169200 | -0.78635900 | C | 12.56737400  | 2.36311800  | 3.04190500  |
| C   | 8.49633600  | 0.65186800  | 0.48721300  | H | 13.70151300  | 3.23438200  | 1.42966000  |
| H   | 6.45363900  | 1.15824200  | 0.85486600  | H | 11.29307700  | 1.29667300  | 4.41453000  |
| C   | 9.41126200  | -0.32063500 | 0.04370400  | H | 13.01836700  | 2.98236500  | 3.80786400  |
| H   | 9.59183800  | -2.31477000 | -0.75076200 | C | 11.64026000  | -0.61046200 | -0.98747200 |
| H   | 8.86627800  | 1.60735400  | 0.83438000  | C | 11.21927900  | -0.60469100 | -2.32709300 |
| C   | -6.61699700 | -0.83796500 | -0.04068600 | C | 12.89603100  | -1.15136600 | -0.66916000 |
| C   | -7.53943800 | -1.80434900 | 0.40820800  | C | 12.03434800  | -1.14072600 | -3.32245200 |
| C   | -7.13220600 | 0.39419900  | -0.48977500 | H | 10.25492800  | -0.18171300 | -2.57750900 |
| C   | -8.90468400 | -1.55814600 | 0.39809300  | C | 13.71282800  | -1.66980300 | -1.67240700 |
| H   | -7.17783500 | -2.75557600 | 0.77970000  | H | 13.22261500  | -1.15691700 | 0.36269900  |
| C   | -8.49593400 | 0.65184500  | -0.48493300 | C | 13.28625300  | -1.67277100 | -3.00300500 |
| H   | -6.45304200 | 1.15854600  | -0.85088500 | H | 11.69575400  | -1.12872300 | -4.35208000 |
| C   | -9.41122400 | -0.32147400 | -0.04411900 | H | 14.67996600  | -2.08380000 | -1.41129200 |
|     |             |             |             | H | 13.92072800  | -2.08237200 | -3.77969100 |

# 8. <sup>1</sup>H and <sup>13</sup>C NMR

## 1,3-bis(5-(phenylethynyl)thiophen-2-yl)- 5-octyl-4H-thieno[3,4-c]pyrrole-4,6(5H)-dione (1)

RK-48\_BisThioph-TPD+Ph-Alkyne

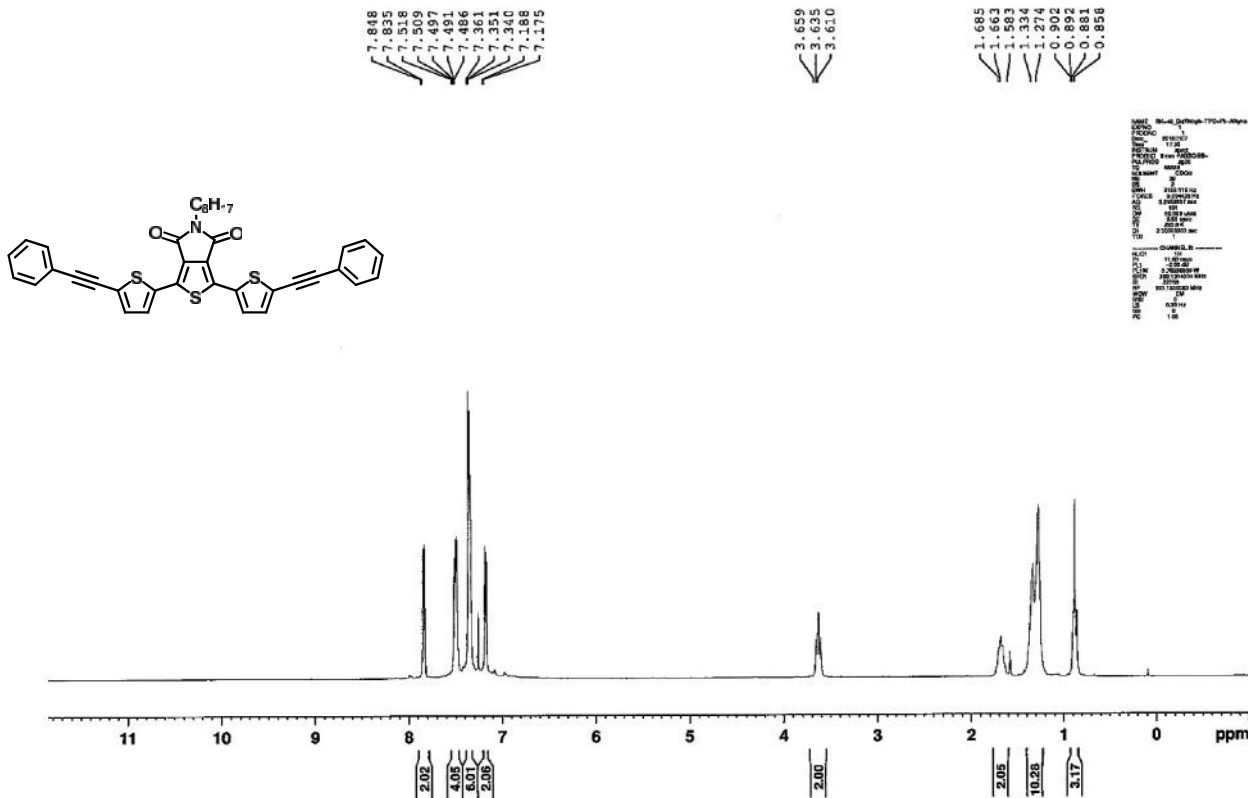

RK-48\_BisThioph-TPD+Ph-Alkyne\_C13

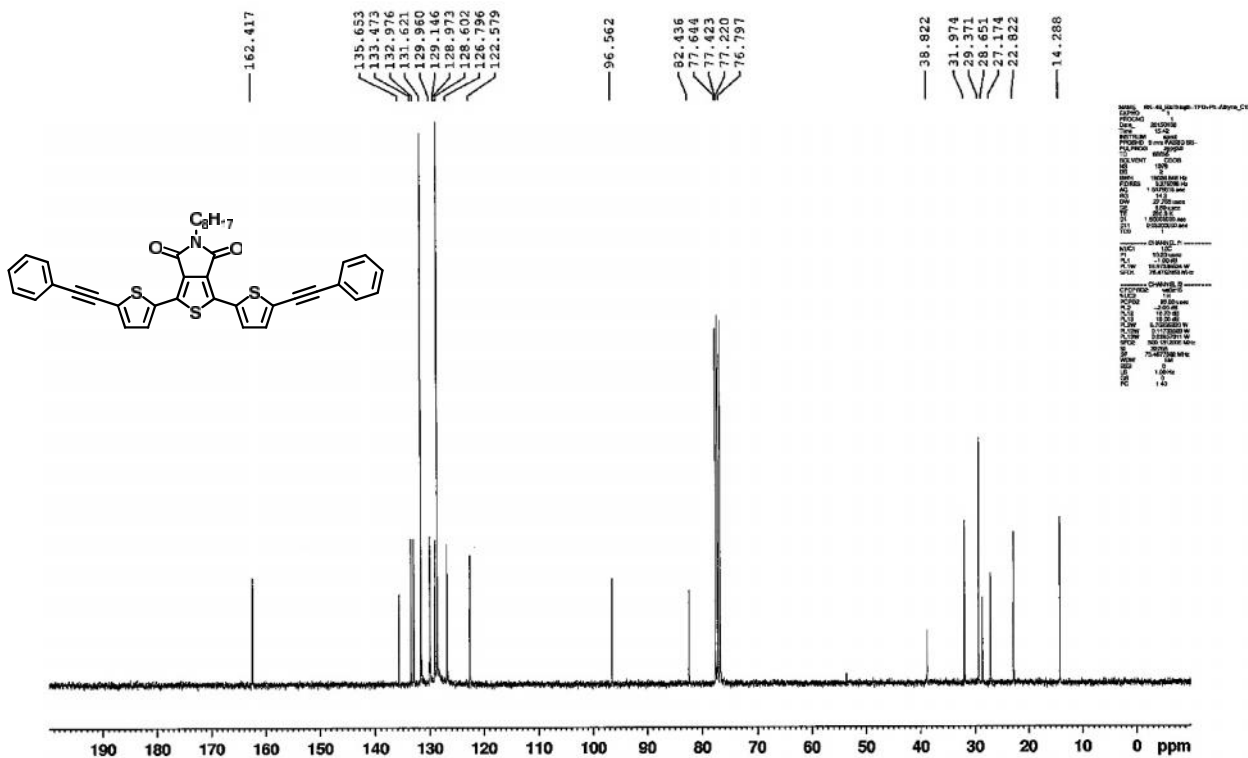

# 1,3-bis(5-((4-methoxyphenyl)ethynyl)thiophen-2-yl)-5-octyl-4H-thieno[3,4-c]pyrrole-4,6(5H)-dione (2)

RK-DiBr-TPD\_MeO\_Alkyne

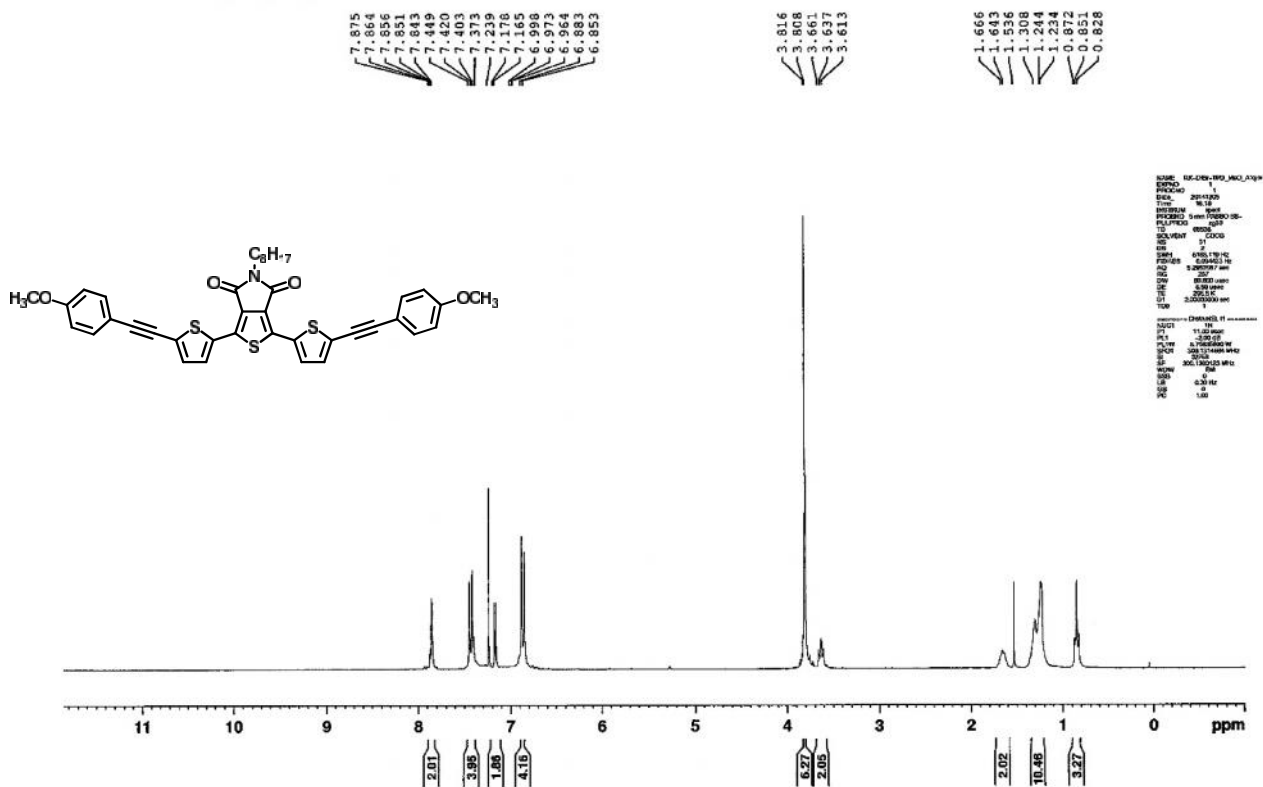

RK-DiBr-MeO\_Alkyne\_C13

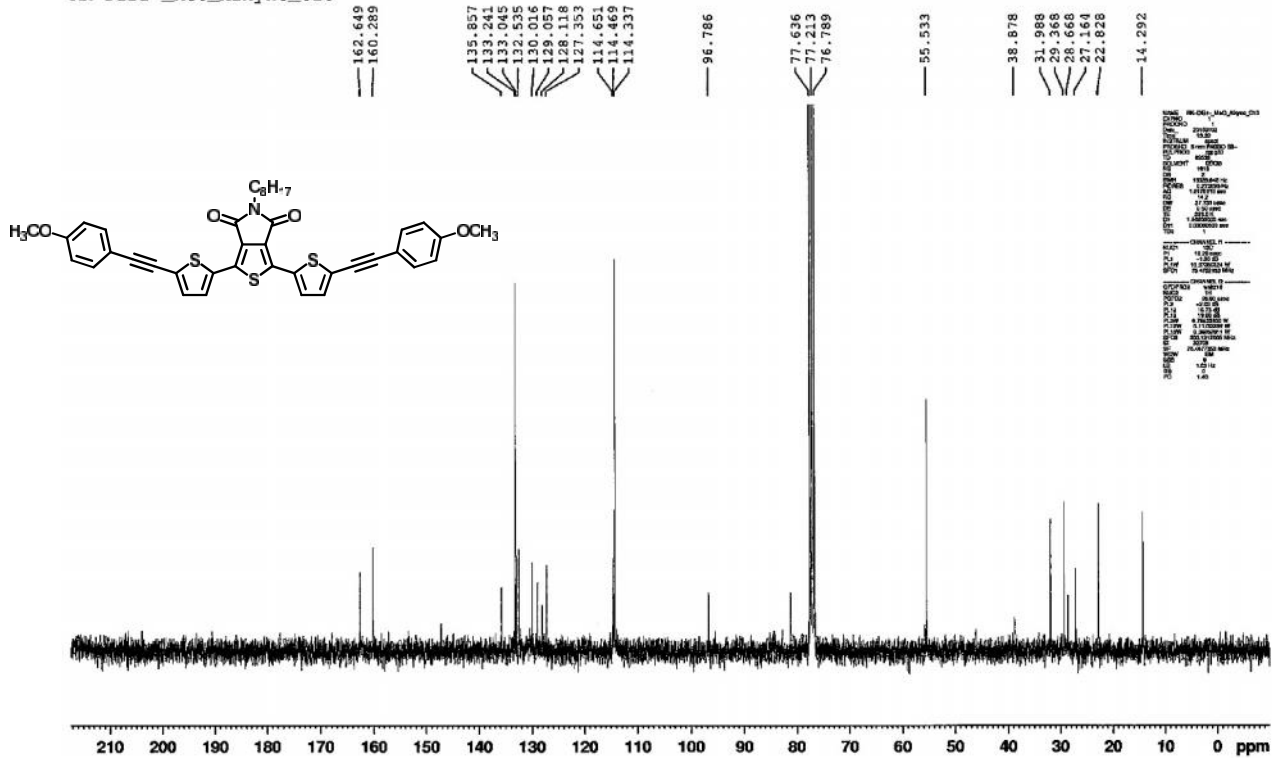

# 1,3-bis(5-((4-(dimethylamino)phenyl)ethynyl)thiophen-2-yl)-5-octyl-4H-thieno[3,4-c]pyrrole-4,6(5H)-dione (3)

RK-49\_BisThioph-TPD+NMe2-Alkyne

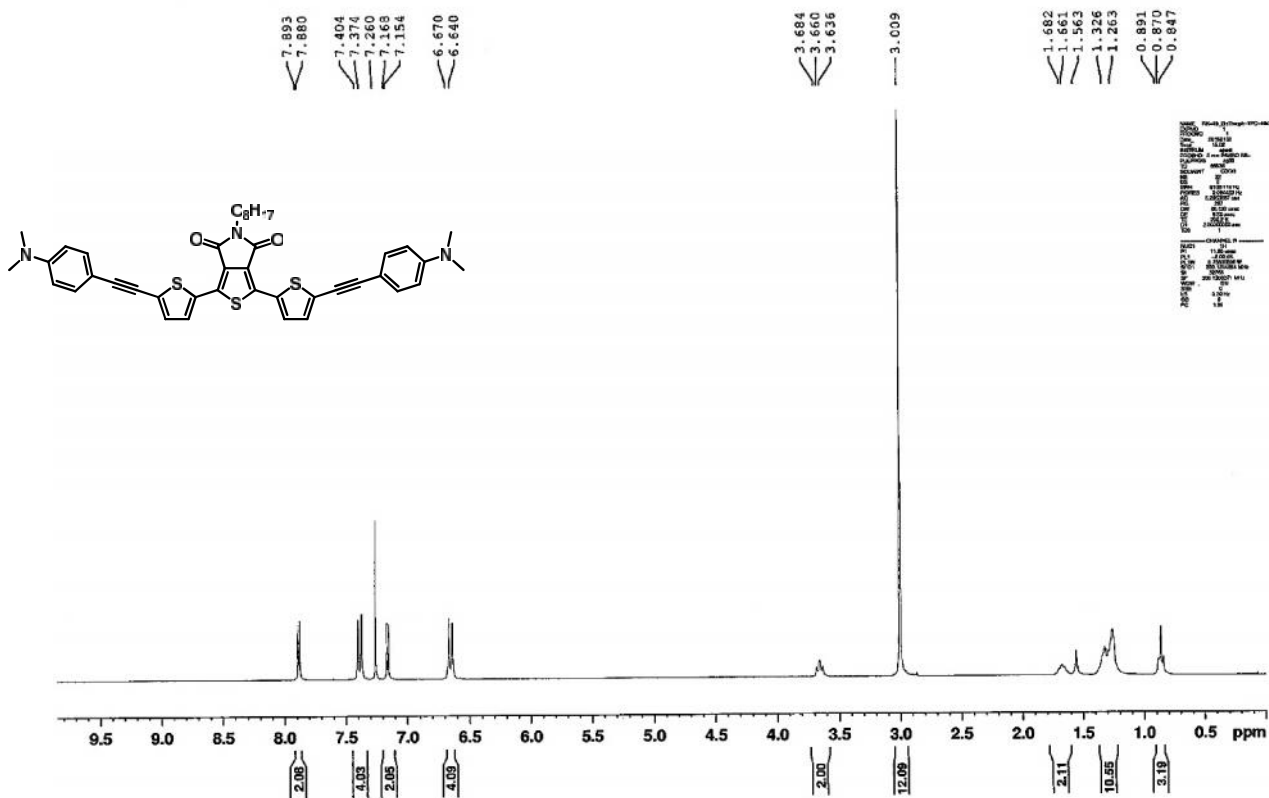

RK-49\_BisThioph-TPD+NMe2-Alkyne\_C13

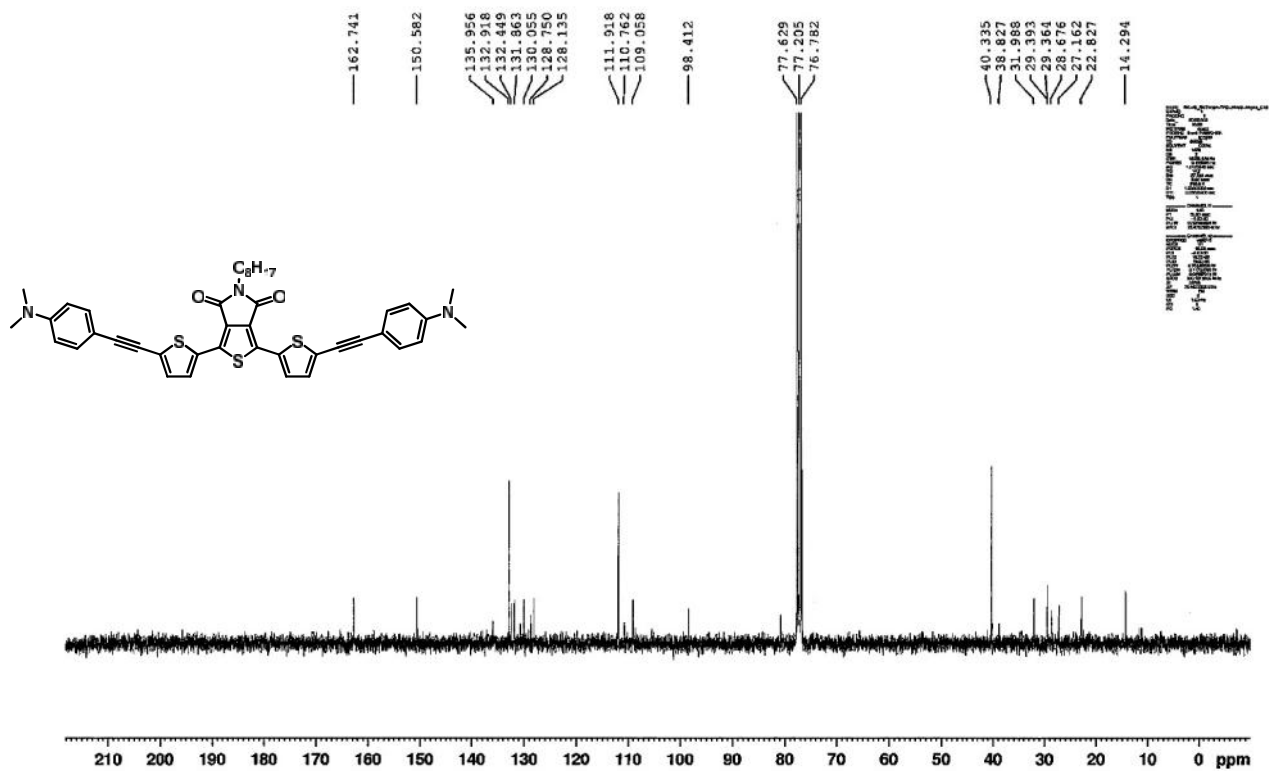

# 1,3-bis(5-(4-(dimethylamino)phenyl)thiophen-2-yl)-5-octyl-4H-thieno[3,4-c]pyrrole-4,6(5H)-dione (4)

RK\_DiBr-TPD+NMe2\_Suzuki

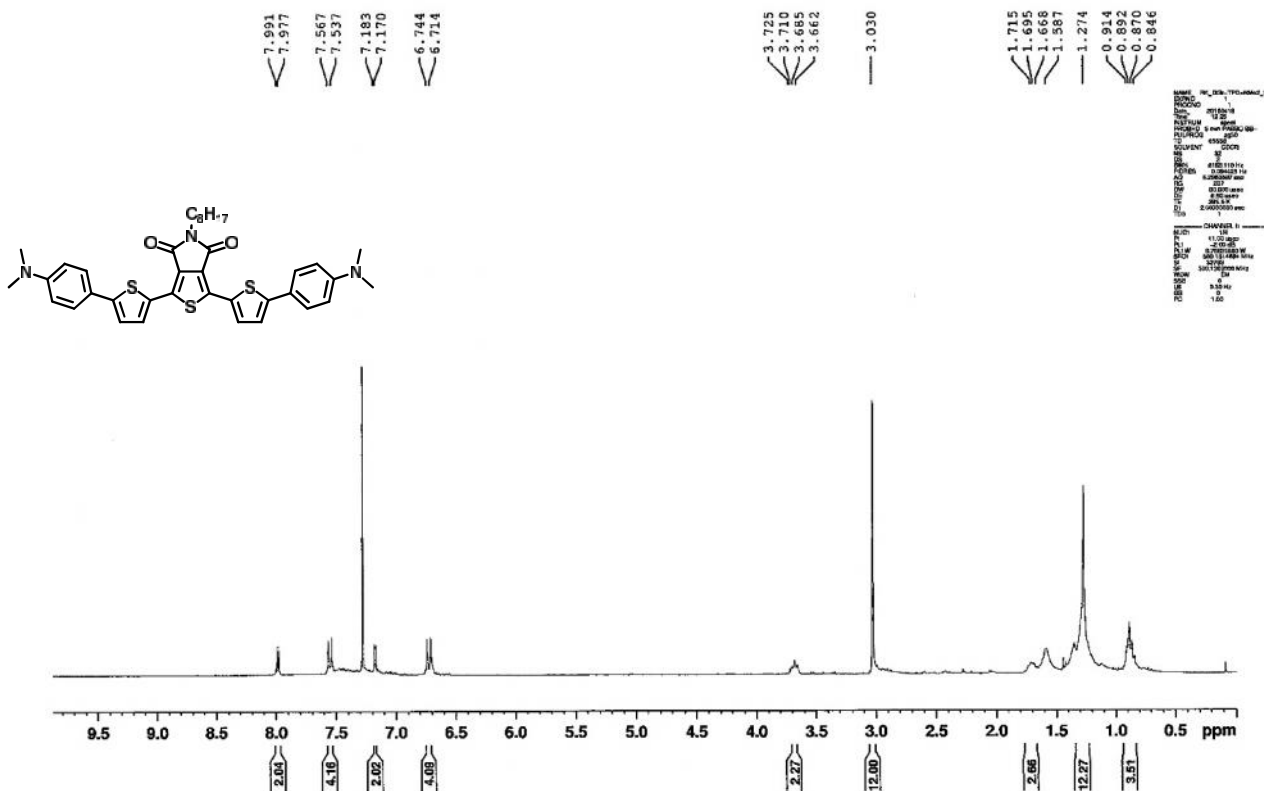

```
NAME RK_DiBr-TPD+NMe2_Suzuki
EXPNO 1
PROCNO 1
PROCPS 1
SOLVENT CDCl3
INSTRUM spect
PROBHD 5 mm PABBO MM
PULPROG zgpg30
TD 65536
SOLVENT CDCl3
AQ 1.20000000
RG 256
WDW EM
SSB 0
LB 3.00
GB 0
PC 1.40
```

RK-DBTPD-NMe2-042915

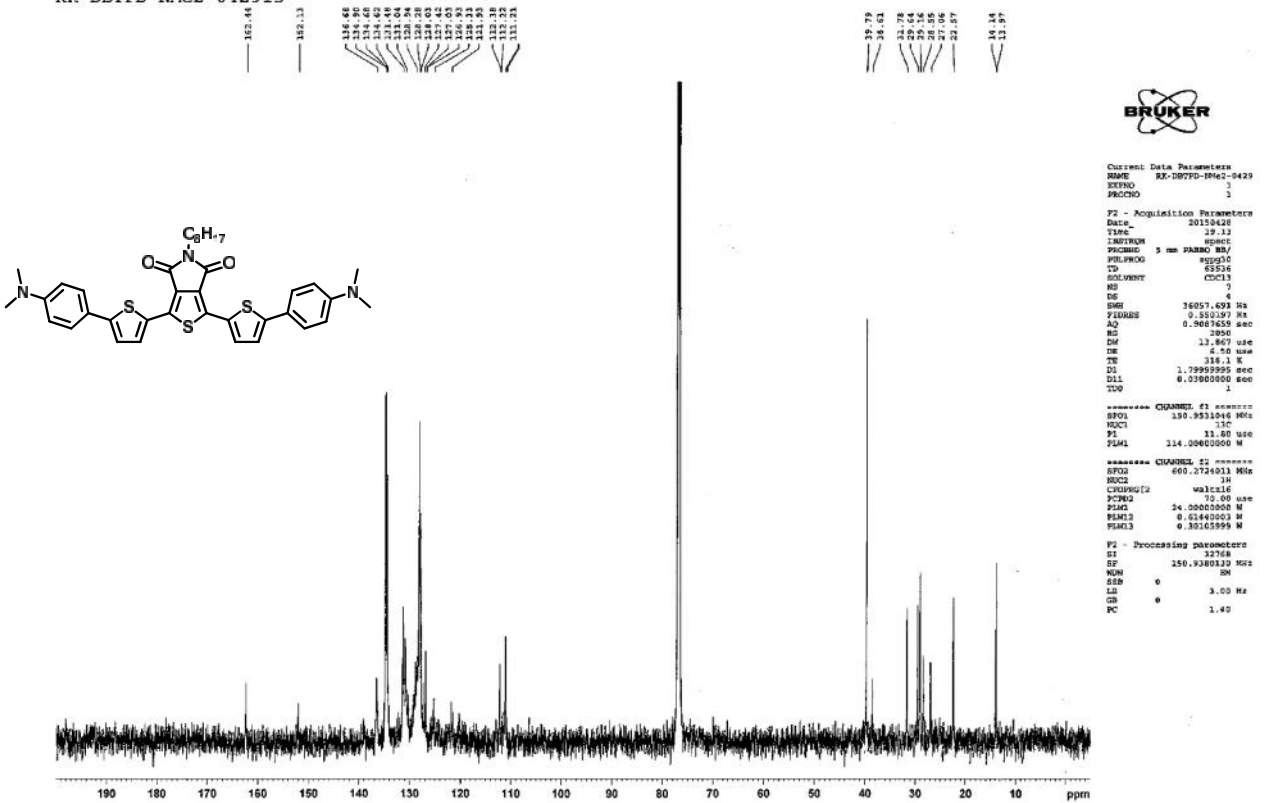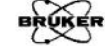

```
Current Data Parameters
NAME RK-DBTPD-NMe2-042915
EXPNO 1
PROCNO 1
PROCPS 1
F2 - Acquisition Parameters
Date_ 20150428
TIME 23.12
INSTRUM spect
PROBHD 5 mm PABBO MM
PULPROG zgpg30
TD 65536
SOLVENT CDCl3
RG 256
WDW EM
SSB 0
LB 3.00
GB 0
PC 1.40
===== CHANNEL f1 =====
NUC1 130.9511046 MHz
P1 11.80 use
P1M1 114.0060000 M
===== CHANNEL f2 =====
NUC2 600.2724013 MHz
P2 1.00 use
P2M1 24.0000000 M
P2M2 0.0260000 M
P2M3 0.30105995 M
F2 - Processing parameters
SI 32768
SF 150.930010 MHz
WDW EM
SSB 0
LB 3.00 Hz
GB 0
PC 1.40
```





thieno[3,4-c]furan-1,3-dione (7)

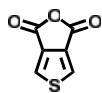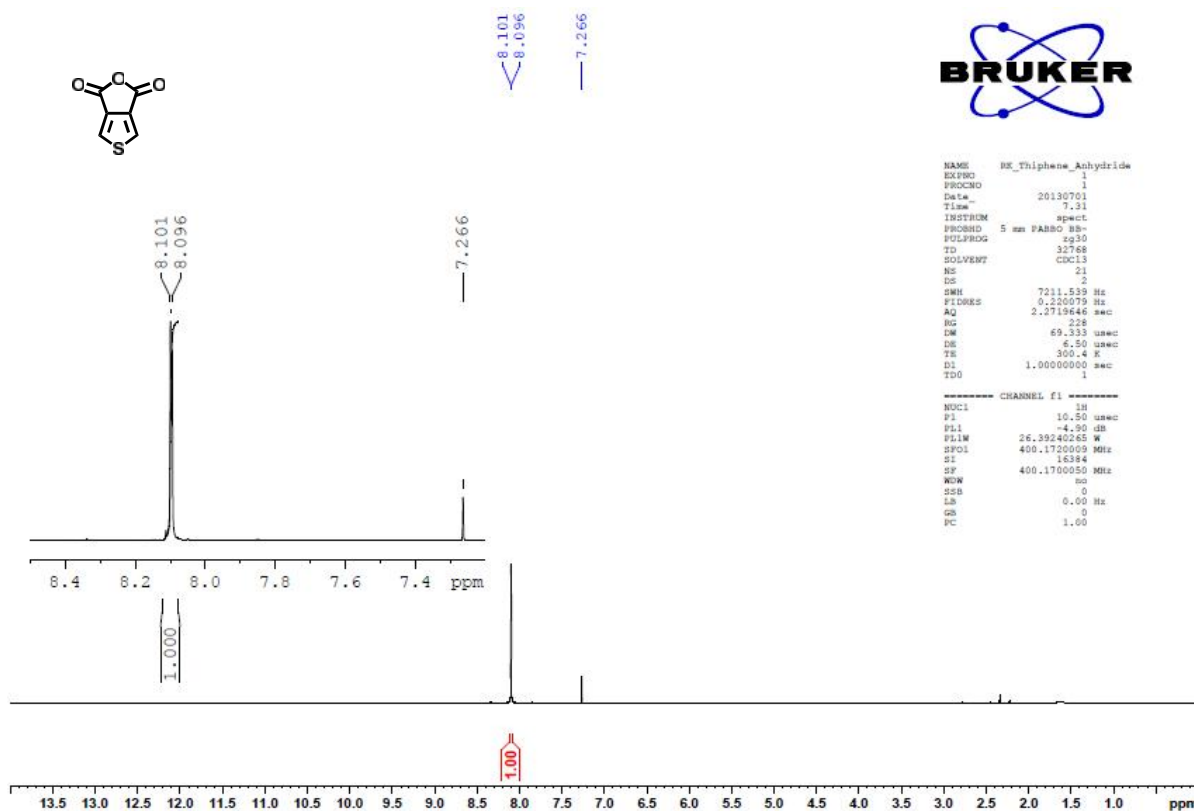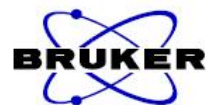

```

NAME    BK_Thiophene_Anhydride
EXPNO   1
PROCNO  1
Date_   20130701
Time    7.31
INSTRUM spect
PROBHD  5 mm PABBO BB-
PULPROG zg30
TD       32768
SOLVENT CDCl3
NS       21
DS       2
SWH      7211.539 Hz
FIDRES   0.220079 Hz
AQ       2.2719446 sec
RG       228
DM       69.333 usec
DE       6.50 usec
TE       300.4 K
D1       1.00000000 sec
TD0      1

----- CHANNEL f1 -----
NUC1     1H
P1       10.50 usec
PL1     -4.90 dB
PL1W    26.3924025 W
SFO1    400.1720009 MHz
SI       16384
SF       400.1700050 MHz
WDW      no
SSB      0
LB       0.00 Hz
GB       0
PC       1.00
    
```

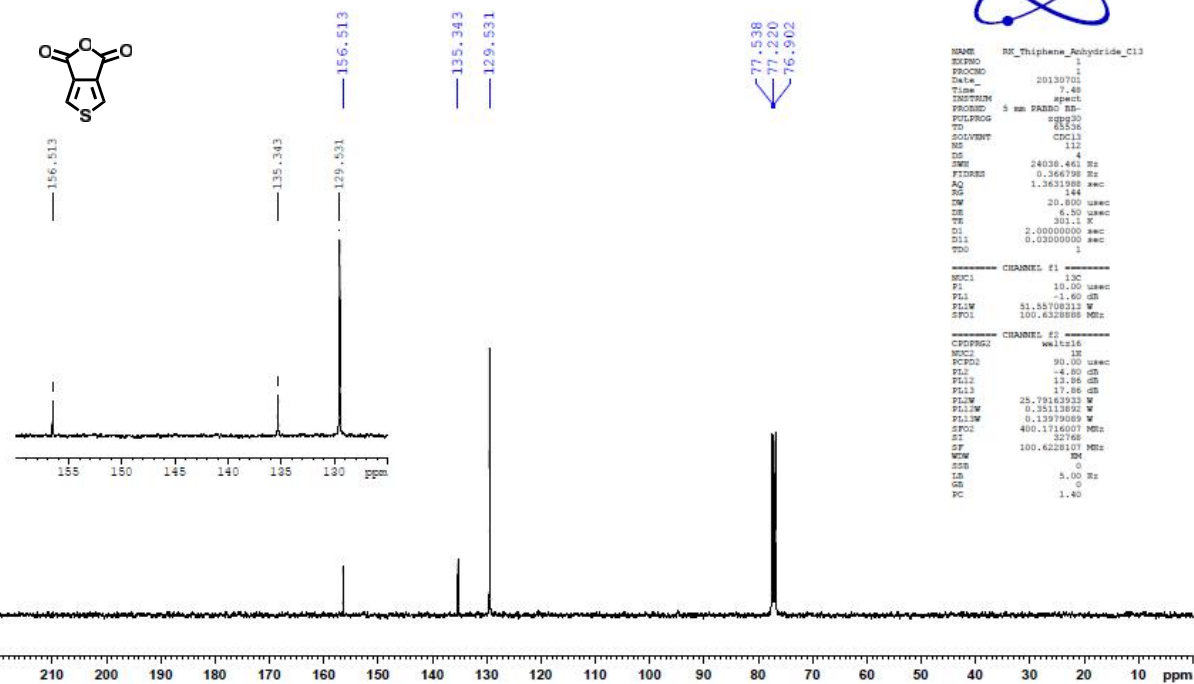

```

NAME    BK_Thiophene_Anhydride_C13
EXPNO   1
PROCNO  1
Date_   20130701
Time    7.48
INSTRUM spect
PROBHD  5 mm PABBO BB-
PULPROG zgpg30
TD       65536
SOLVENT CDCl3
NS       112
DS       4
SWH      24038.461 Hz
FIDRES   0.346798 Hz
AQ       1.3631988 sec
RG       144
DM       20.800 usec
DE       6.50 usec
TE       301.1 K
D1       2.00000000 sec
D11     0.03000000 sec
TD0      1

----- CHANNEL f1 -----
MPC1     13C
P1       10.00 usec
PL1     -1.50 dB
PL1W    51.85708213 W
SFO1    100.6228888 MHz

----- CHANNEL f2 -----
CPDPRG2 waltz16
MPC2     1H
PCPD2   90.00 usec
PL2     -4.80 dB
PL12    13.86 dB
PL13    17.86 dB
PL1W    25.79183933 W
PL1W    0.25113852 W
PL1W    0.13979089 W
SFO2    400.1716007 MHz
SI       32768
SF       100.6228101 MHz
WDW      RM
SSB      0
LB       5.00 Hz
GB       0
PC       1.40
    
```

# 5-octyl-4H-thieno[3,4-c]pyrrole-4,6(5H)-dione (9)

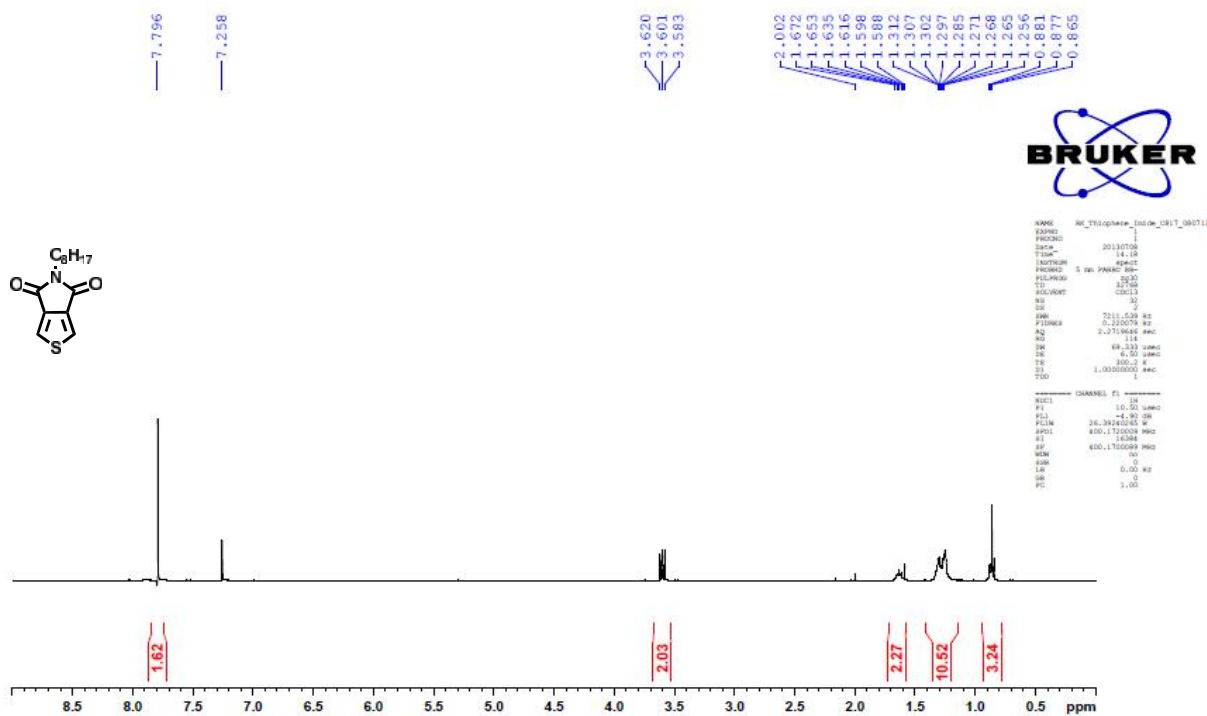

1,3-dibromo-5-octyl-4H-thieno[3,4-c]pyrrole-4,6(5H)-dione (10)

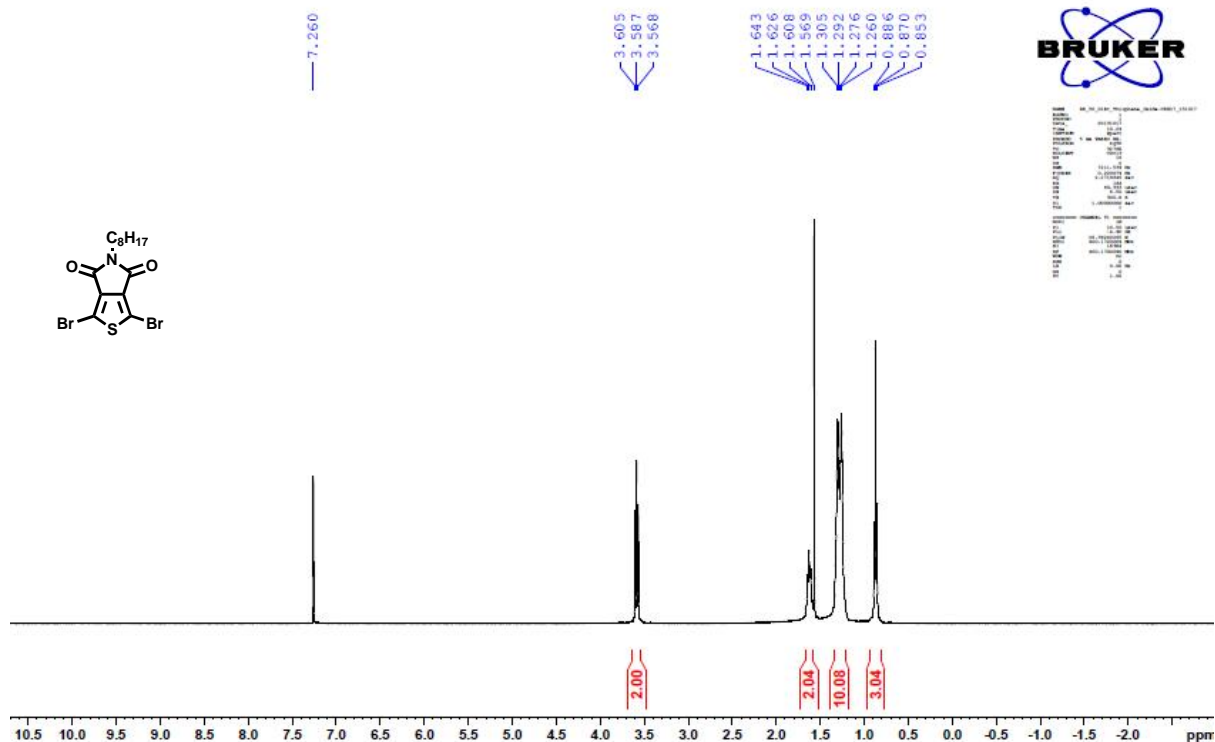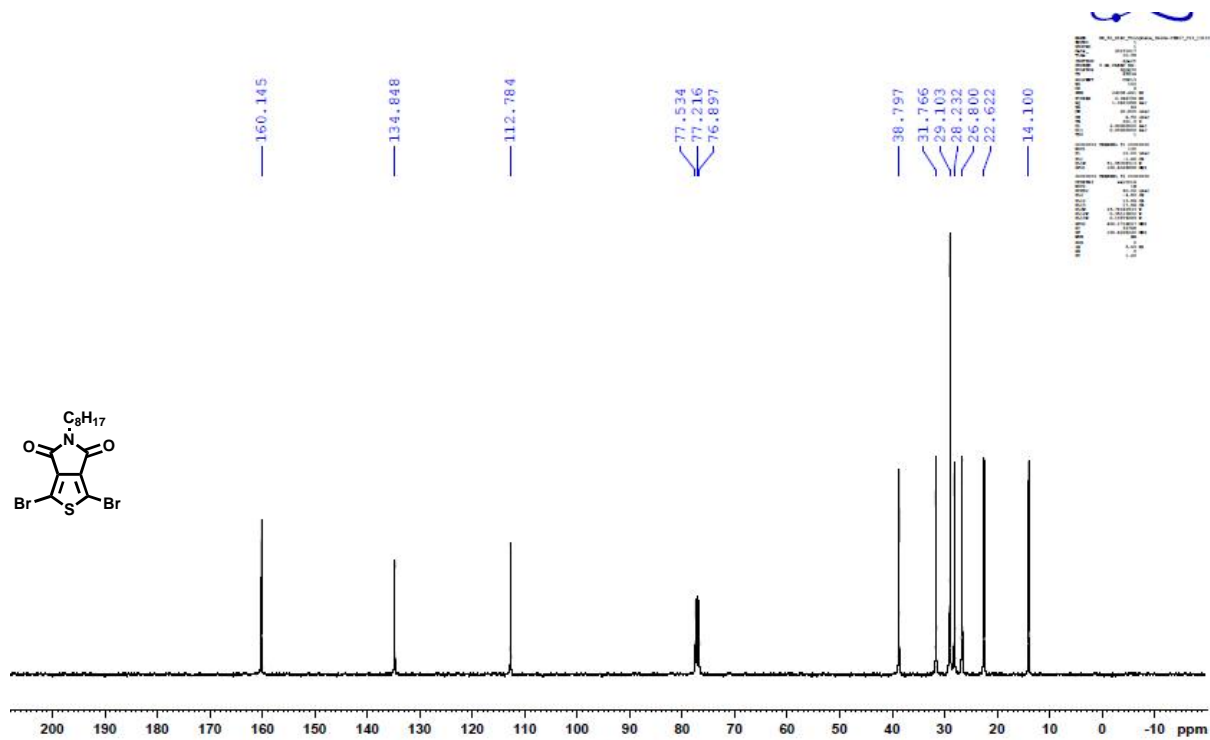

5-octyl-1,3-di(thiophen-2-yl)-4H-thieno[3,4-c]pyrrole-4,6(5H)-dione (11)

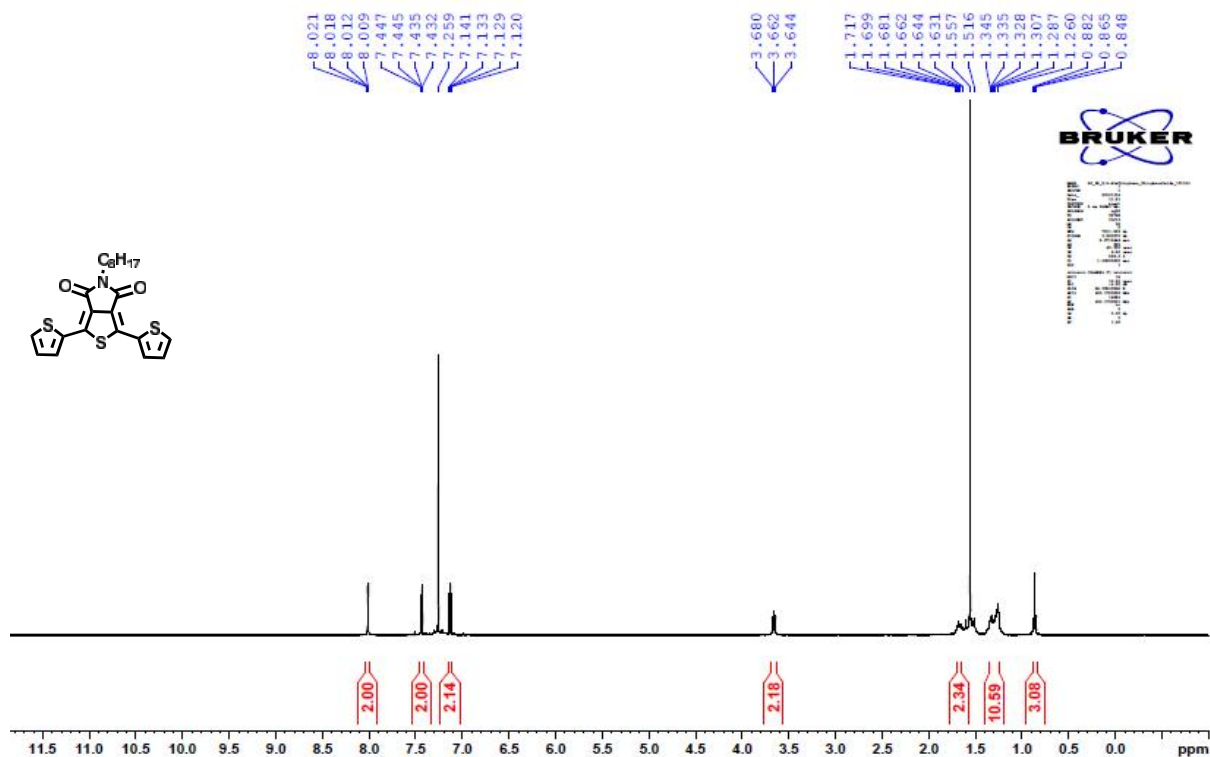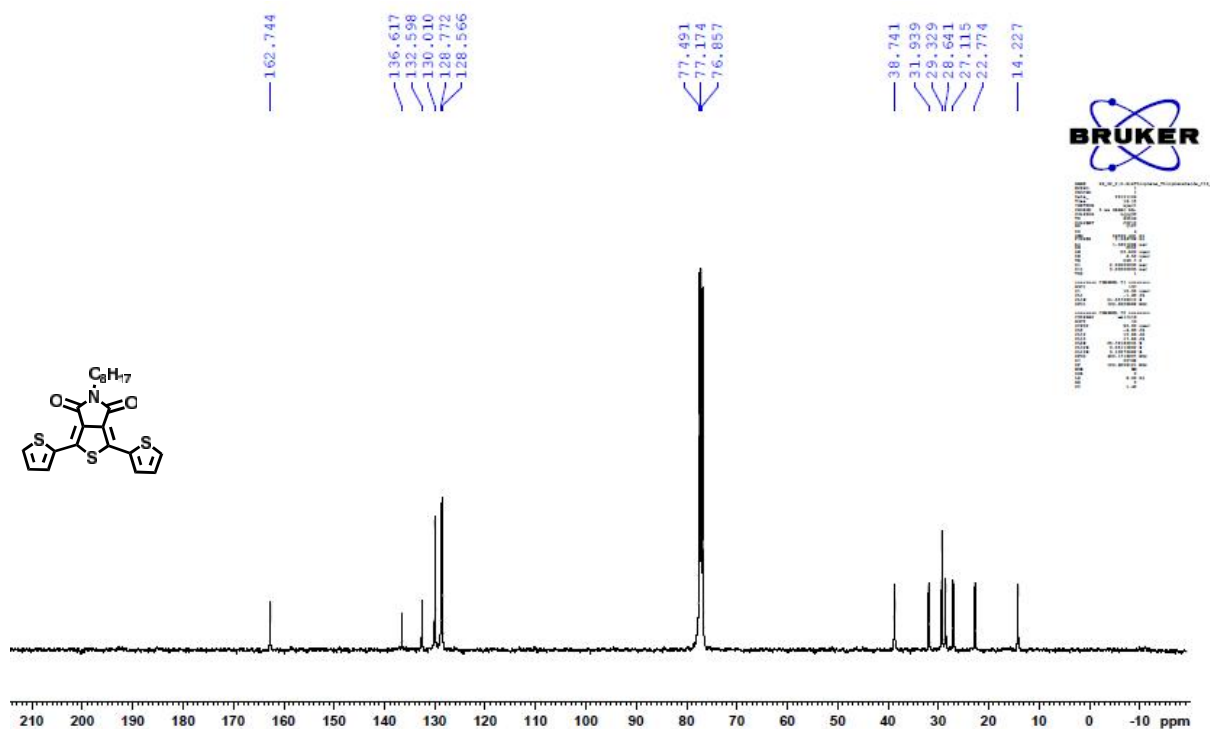

1,3-bis(5-bromothiophen-2-yl)-5-octyl-4H-thieno[3,4-c]pyrrole-4,6(5H)-dione (12)

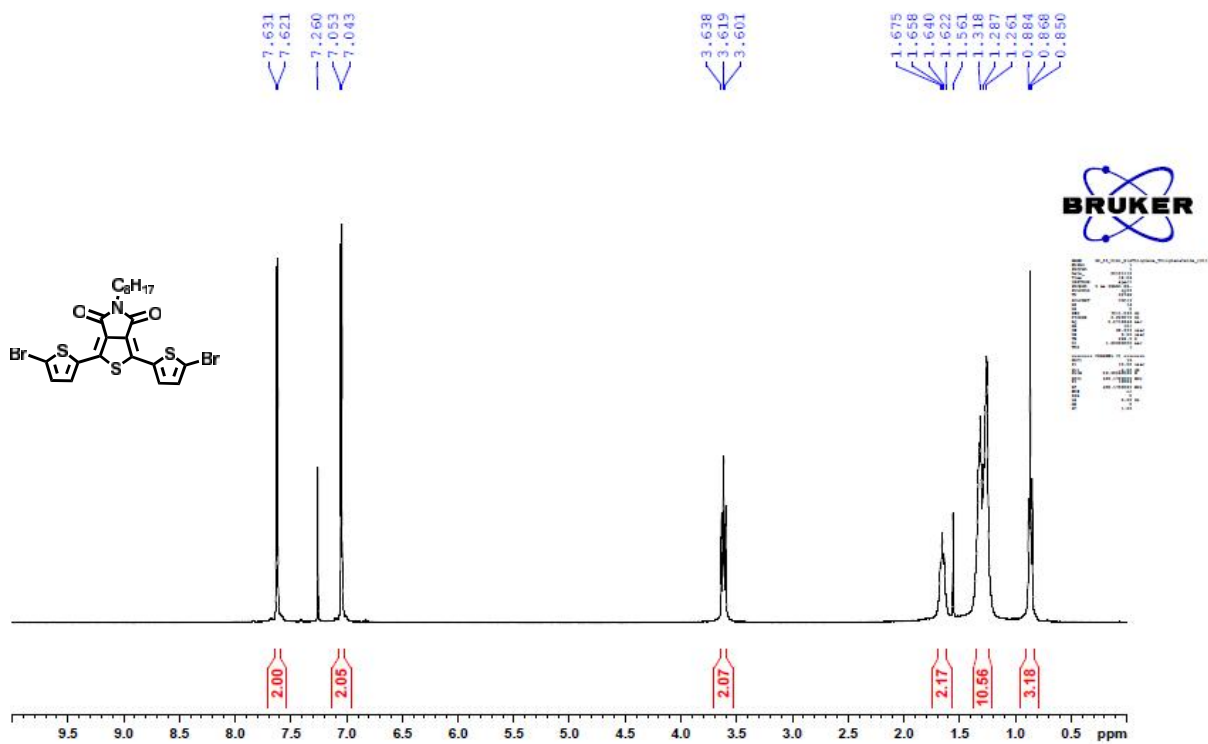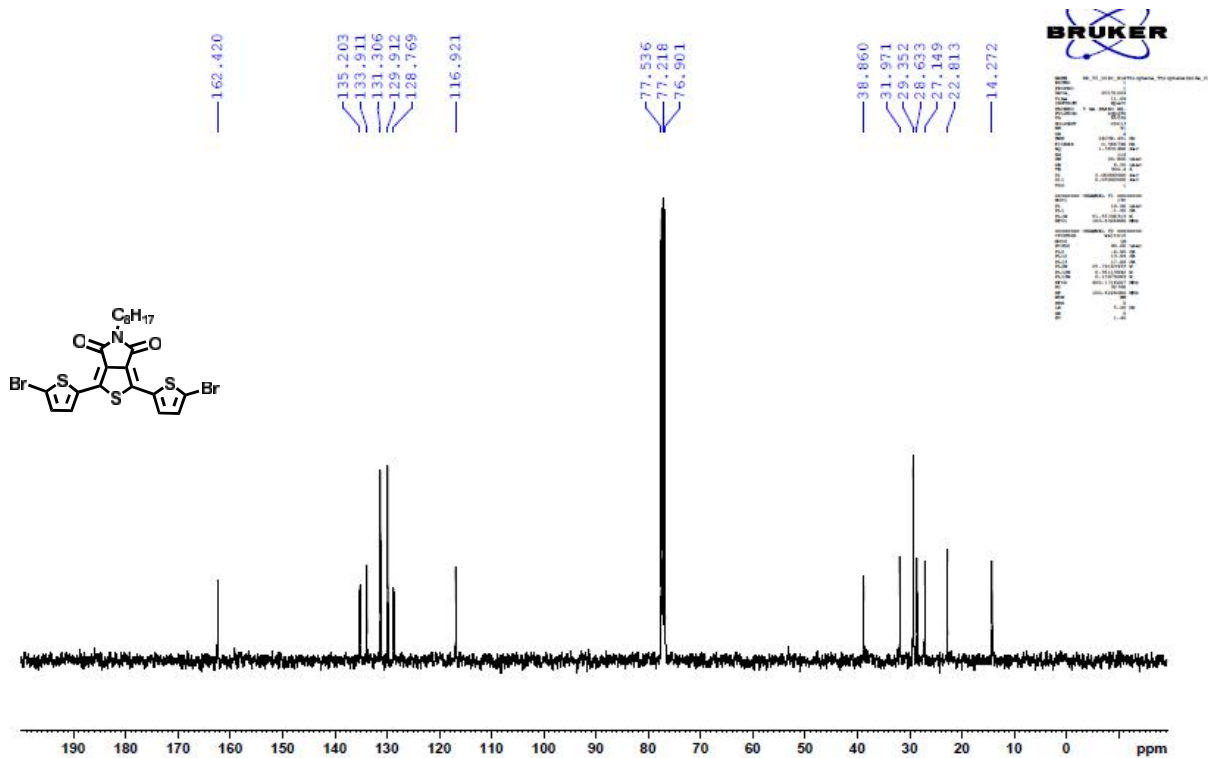

Supplement: c5ra13416a1.pdf [file c5ra13416a1.pdf]
